# Supplementary material for: A facile method for the synthesis of a C@MoO2 hollow yolk–shell structure and its electrochemical properties as a faradaic electrode
Source: Royal Society of Chemistry journal article supplement (doi:10.1039/c7qm00006e), 2017-01-01
Supplement: c7qm00006e1.pdf [file c7qm00006e1.pdf]

## Electronic Supplementary Information (ESI).

### C@MoO<sub>2</sub> hollow yolk-shell structure with excellent Electrochemical Properties as Faradaic Electrode

Arka Saha,<sup>a</sup> Aniruddha Mondal,<sup>a</sup> Sandipan Maiti,<sup>b</sup> Subhash C. Ghosh,<sup>a</sup>  
Sourindra Mahanty,<sup>b\*</sup> and Asit Baran Panda<sup>a\*</sup>

<sup>a</sup> Central Salt and Marine Chemicals Research Institute (CSIR-CSMCRI) and CSMCRI- Academy of Scientific and Innovative Research, G. B. Marg, Bhavnagar-364002, Gujarat, India. E-mail: [abpanda@csmcri.org](mailto:abpanda@csmcri.org).

<sup>b</sup> CSIR-Central Glass & Ceramic Research Institute, Raja S C Mullick Road, Kolkata-700032, India. E-mail: [mahanty@cgcric.res.in](mailto:mahanty@cgcric.res.in)

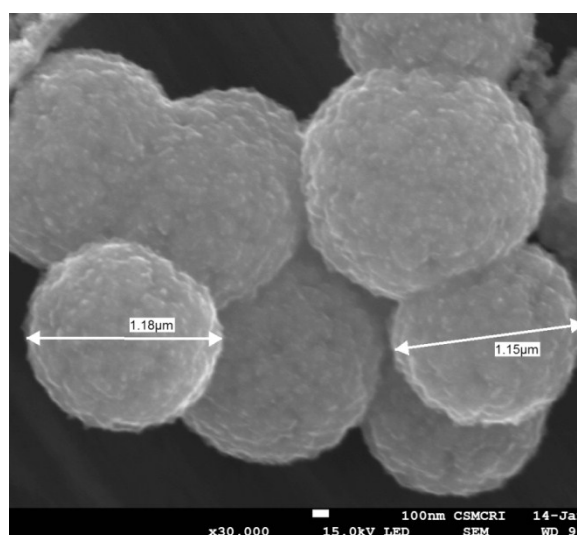

**Fig. S1** FE-SEM image of the as-synthesized C@MoO<sub>2</sub>.

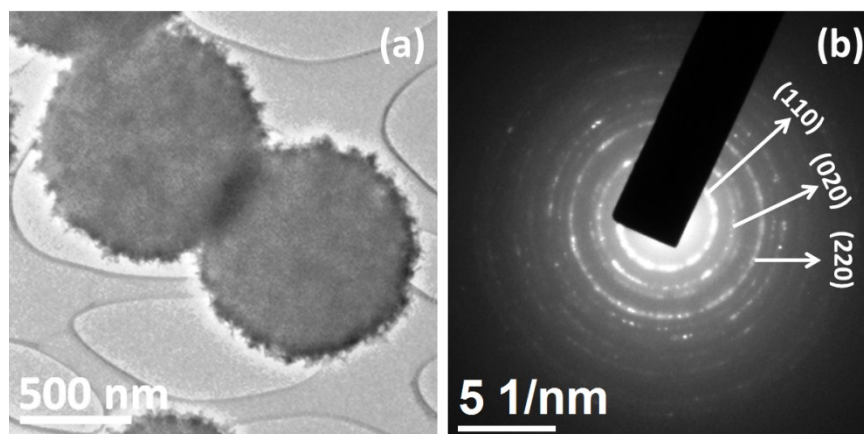

**Fig. S2** (a) TEM image of as-synthesized C@MoO<sub>2</sub> and (b) SAED pattern of calcined C@MoO<sub>2</sub>.

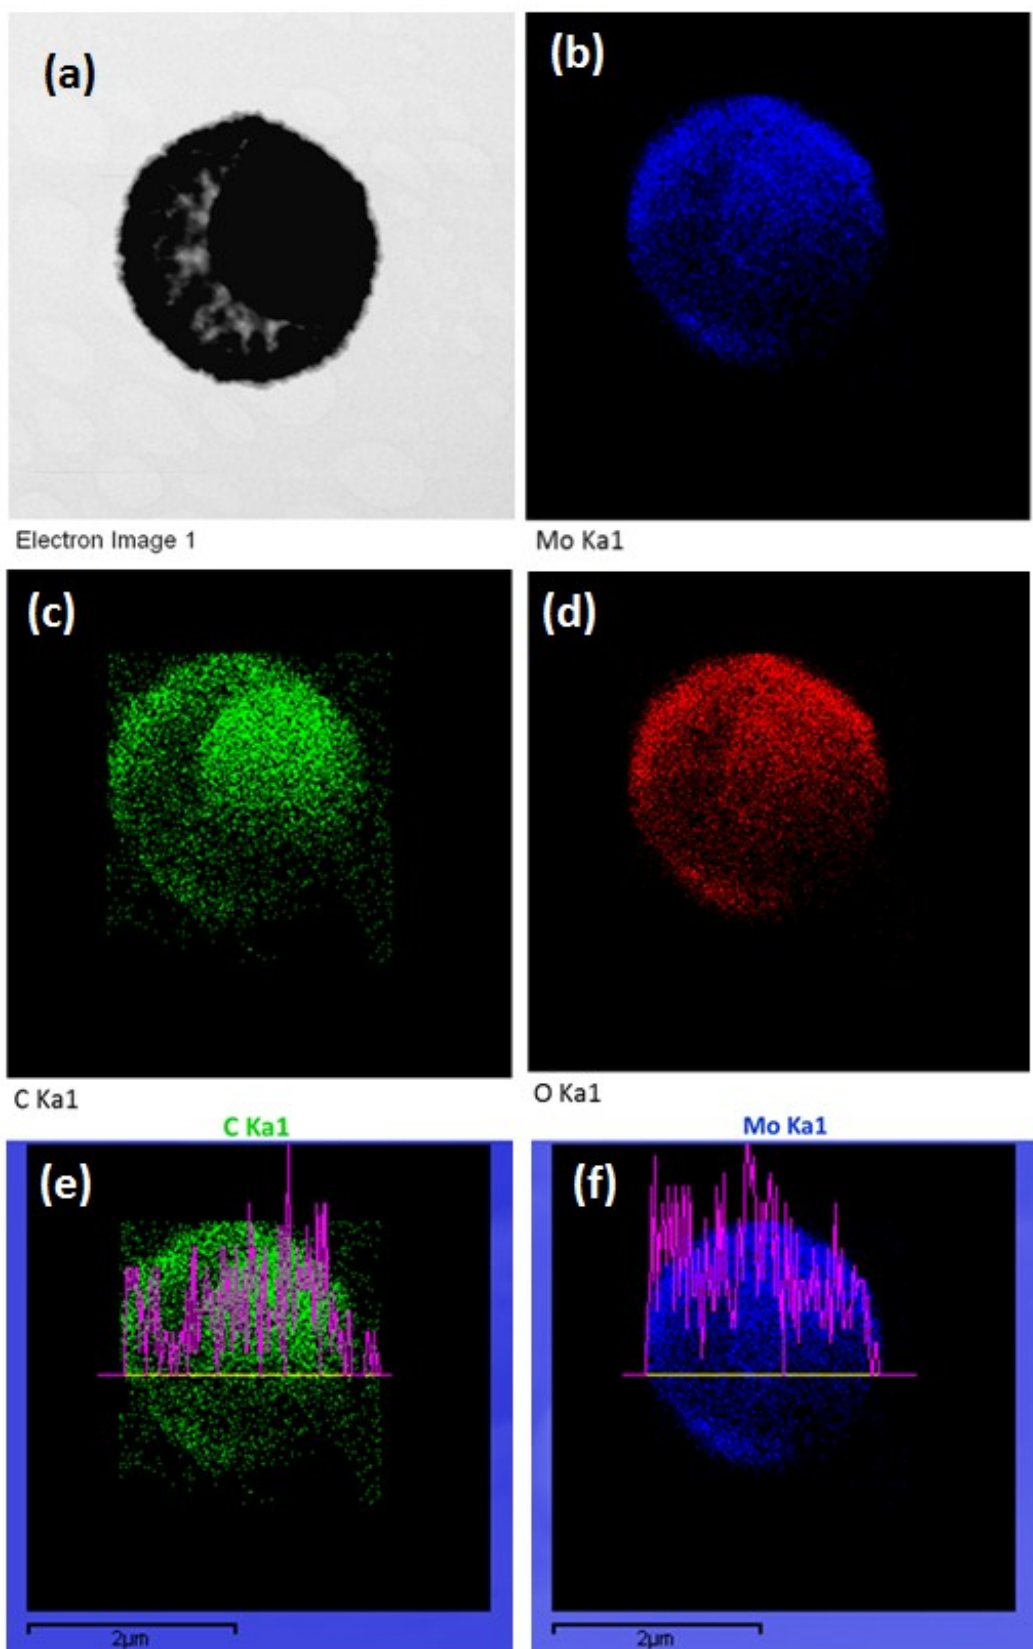

**Fig. S3** (a)TEM image (b-d) elemental mapping image and (e-f) corresponding EDX line scan image of calcined C@MoO<sub>2</sub> hollow spheres.

The TEM image Fig.S3(a) confirmed the formation of hollow yolk-shell structure. The corresponding elemental mapping images Fig.S3(b-d) distinctly indicate that carbon is present in throughout the sphere but density of carbon in inner yolk is more. Whereas, Mo and O is homogeneously distributed in throughout the spheres. Similarly, in corresponding line scan Fig.S3(e-f) evidenced that concentration of carbon in yolk is high than that of shell and concentration of Mo in shell is more than that of core. However, it is hard to get exact information about the composition of inner yolk, as the size of the sphere is very high. Corresponding EDX elemental analysis result indicate the presence of ~8wt% of carbon in the sphere.

Although, the amount and ratio of Mo and O in the EDX elemental analysis result is in good agreement as expected, but surprisingly the amount of C is quite low (~8 wt %) than that of amount obtained from TG analysis (22%). This conformed that inner yolk contains majority of carbon, which is beyond the identification reach of EDX.

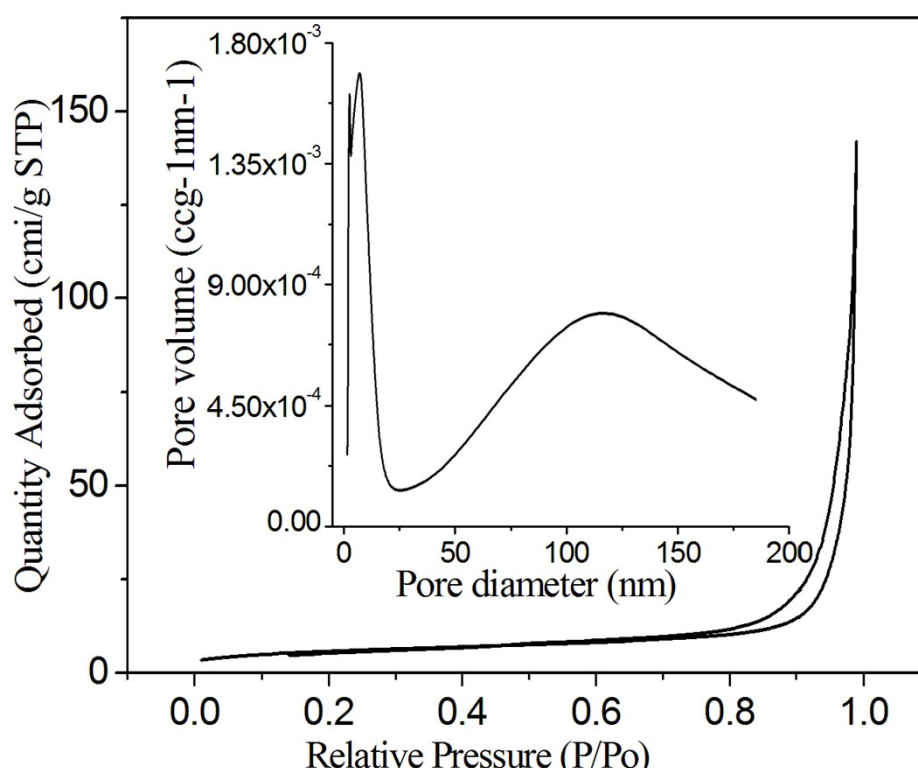

**Fig. S4** The nitrogen sorption isotherm and the corresponding pore size distribution curve (inset) of calcined C@MoO<sub>2</sub> sample.

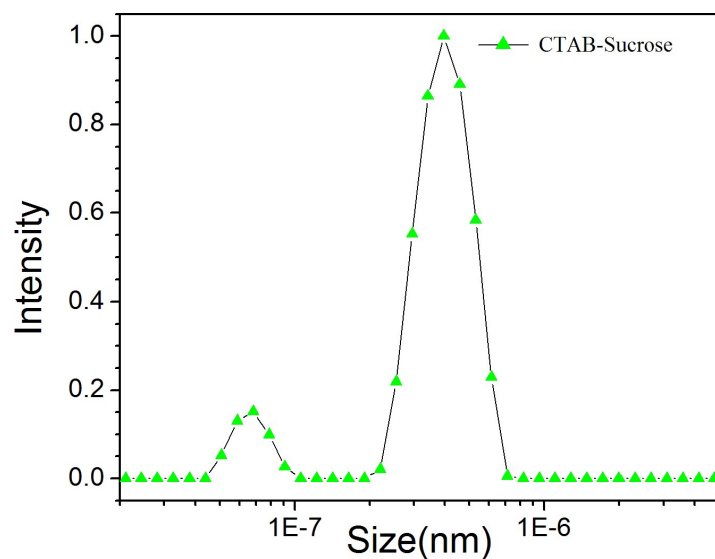

**Fig. S5** The obtained average size of soft template *in-situ* formed through the CTAB-Sugar interaction obtained in the DLS measurement.

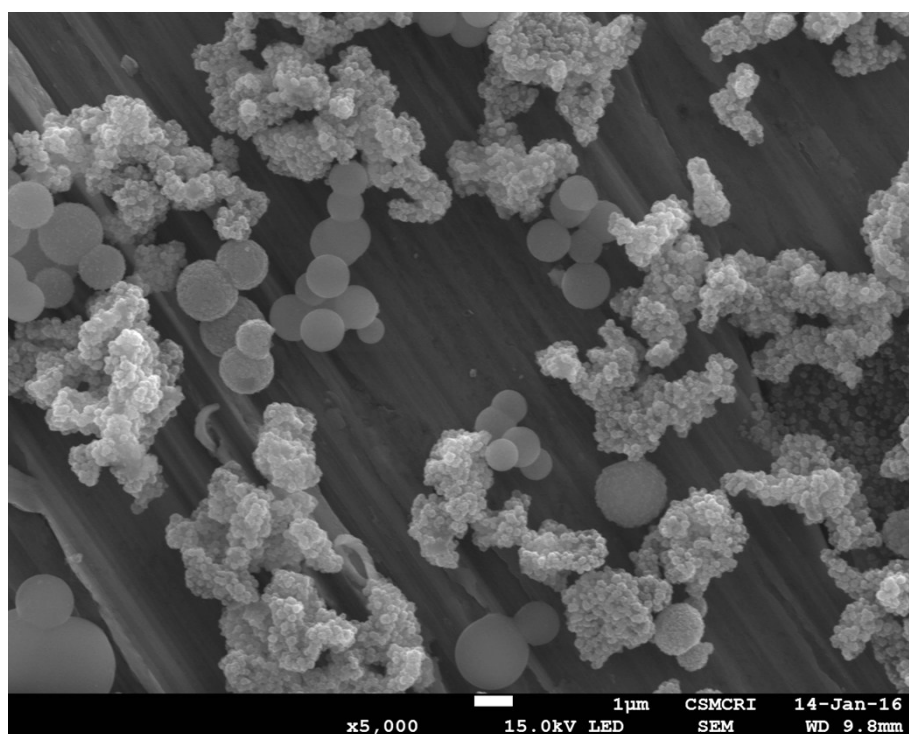

**Fig. S6** Phase separated carbon sphere with randomly distributed  $\text{MoO}_2$  nano particle formed when ammonium hydroxide was used instead of ammonium carbonate.

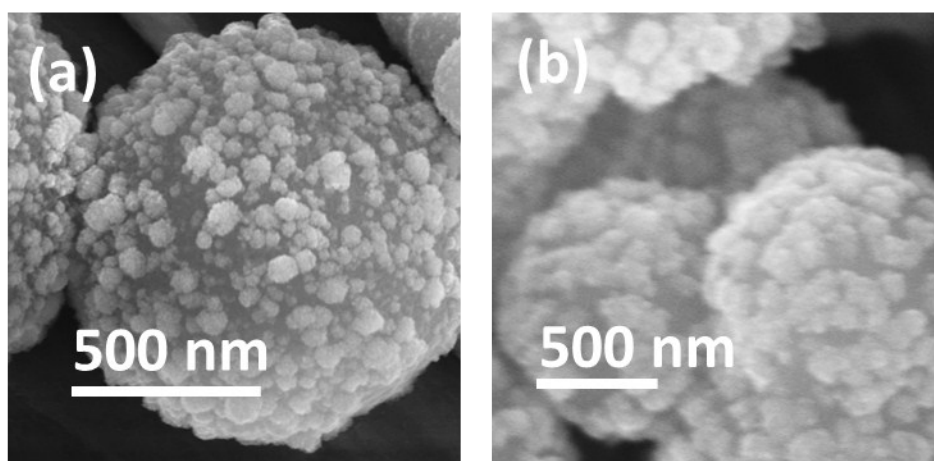

**Fig. S7** SEM images of the materials formed in 4h (a) and 12h (b) with varying concentration of MoO<sub>2</sub> particles.

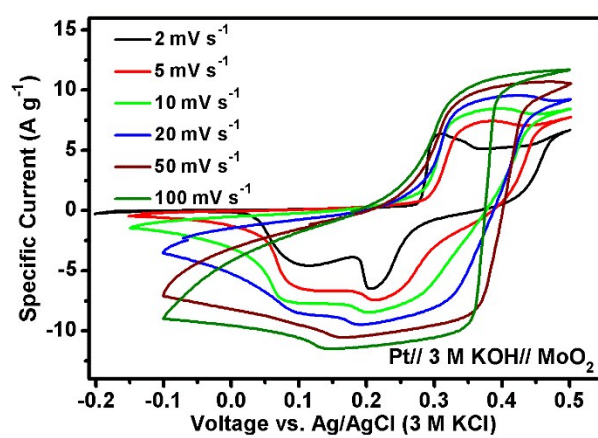

**Fig. S8** The corresponding CV plots for MoO<sub>2</sub> at different current density.

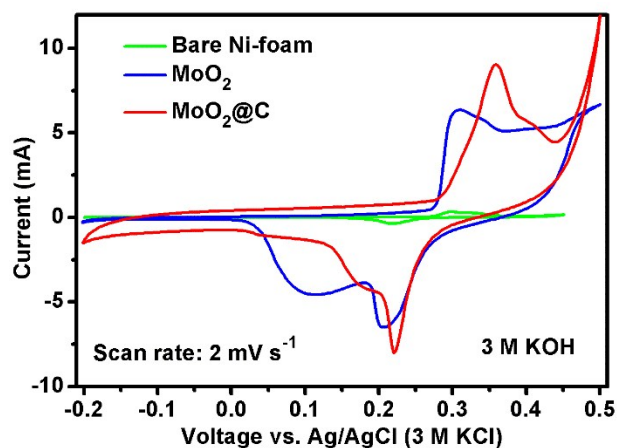

**Fig. S9** Comparison of CV plots for bare Ni foam,  $\text{MoO}_2$  and  $\text{MoO}_2@\text{C}$  at a scan rate of  $2 \text{ mV s}^{-1}$ . Calculated from the area under the curve, the overall faradic current contribution of Ni foam is  $\sim 2.5\%$  with respect to that of  $\text{MoO}_2 / \text{MoO}_2@\text{C}$ .

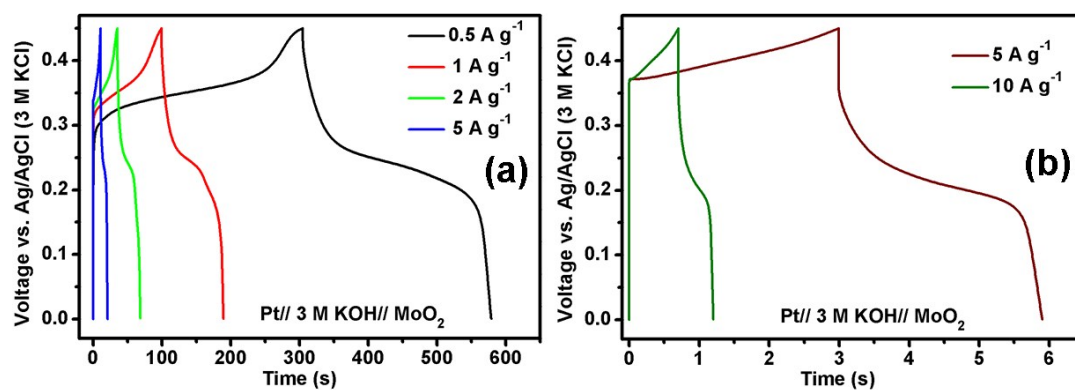

**Fig. S10(a) & (b)** Galvanostatic charge-discharge profiles of  $\text{MoO}_2$  at varying current densities.



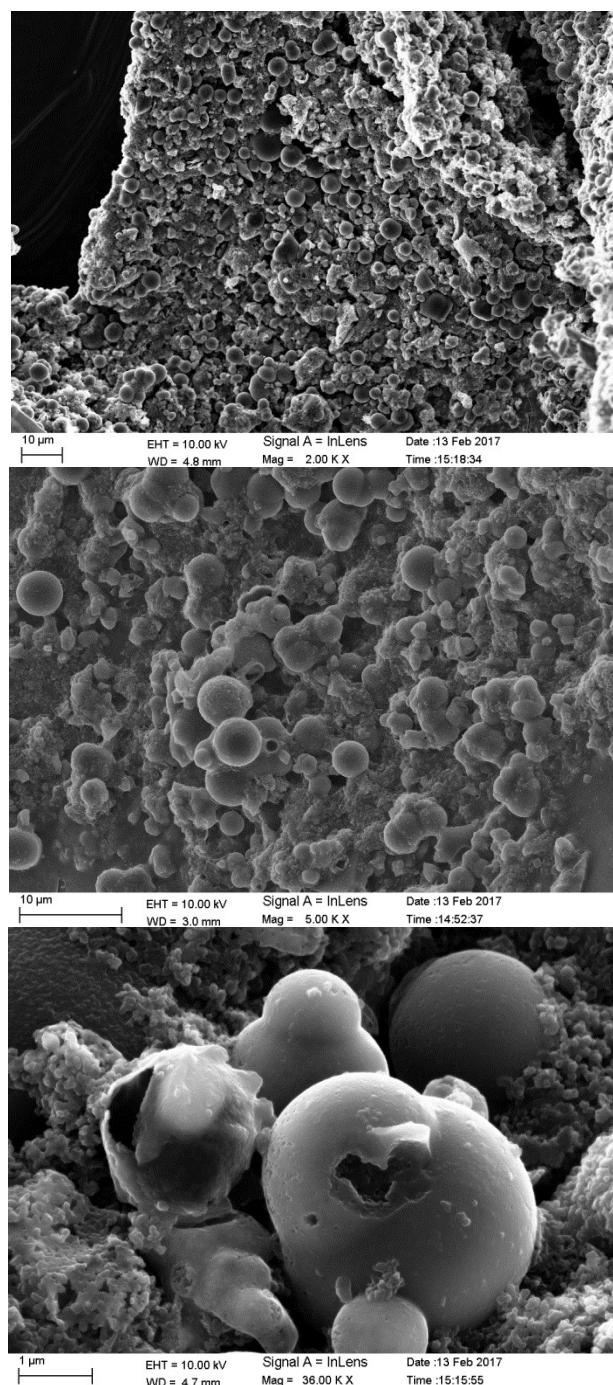

**Fig. S11** FESEM micrographs of C@MoO<sub>2</sub> electrode film after 1000 cycles in the discharge state.

**Table S1** MoO<sub>2</sub> based electrodes for supercapacitors.

| <b>Electrode material and loading amount</b>                        | <b>Specific Capacitance</b>      | <b>Electrolyte used</b>                                                   | <b>Cycling performance</b>                          | <b>Reference</b> |
|---------------------------------------------------------------------|----------------------------------|---------------------------------------------------------------------------|-----------------------------------------------------|------------------|
| Ployanile-h-MoO <sub>3</sub> hollow nano rod (1mg/cm <sup>2</sup> ) | 247 F/g at 1 A/g                 | 1.0 M H <sub>2</sub> SO <sub>4</sub>                                      | 80% capacity retention after 5000 cycles at 50 mV/s | 1                |
| MoO <sub>3</sub> sheet/CNT (0.7 mg/cm <sup>2</sup> )                | 540 F/g at 0.01 mV/s             | 1.0 M LiCl <sub>4</sub>                                                   |                                                     | 2                |
| h-MoO <sub>3</sub> 0.95±0.05 mg/cm <sup>2</sup>                     | 230 F/g at 0.25 A/g              | 1.0 M H <sub>2</sub> SO <sub>4</sub>                                      | 74% capacity retention after 3000cycle at 50 mV/s   | 3                |
| Reduced MoO <sub>3</sub> 1.8 to 1.96 mg/cm <sup>2</sup>             | 196 F/cm <sup>3</sup> at 0.5 A/g | 5 M LiCl                                                                  | 89% capacity retention after 10000 cycle at 1 A/g   | 4                |
| α-MoO <sub>3</sub> nano belt                                        | 368 F/g at 0.25 A/g              | 0.5 M aq. LiSO <sub>4</sub>                                               | 95% capacity retention after 500 cycle at 0.25 A/g  | 5                |
| α-MoO <sub>3</sub> -graphene 10 mg/cm <sup>2</sup>                  | 380 F/g at 0.2 A/g               | 1.0 M H <sub>2</sub> SO <sub>4</sub>                                      | 100% capacity retention after 1000 cycle at 1 A/g   | 6                |
| MoO <sub>3</sub> /multiwall CNT 30 mg/cm <sup>2</sup>               | 93 F/g at 5 mV/s                 | 0.1 M TBAP in DMF                                                         | 55% capacity retention after 800 cycle              | 7                |
| Magnetron sputtered MoO <sub>3</sub> /CNTs                          | 70 F/g at 10 mV/s                | 1.0 M Na <sub>2</sub> SO <sub>4</sub>                                     | 82% capacity retention after 800 cycle at 100 mV/s  | 8                |
| MoO <sub>3</sub> /C hybrid 1.5 mg/cm <sup>2</sup>                   | 331 F/g at 1 A/g                 | 1.0 M H <sub>2</sub> SO <sub>4</sub>                                      | 71 % capacity retention after 10000 cycle at 10 A/g | 9                |
| MoO <sub>3</sub> nano wire                                          | 288 F/g at 5 mV/s                | 1.0 M H <sub>2</sub> SO <sub>4</sub> in ethylammonium nitrate electrolyte | 96% capacity retention after 3000 cycle at 0.5 A/g  | 10               |
| MoO <sub>3</sub> nano plate 1.5 mg in 0.4cm <sup>2</sup>            | 280 F/g at 5                     | 0.5 M LiSO <sub>4</sub>                                                   | 100% capacity retention after 400                   | 11               |



|                                                                      | mV/S                                                                  |                                       | cycle at 2000 mA/g                                                                           |                     |
|----------------------------------------------------------------------|-----------------------------------------------------------------------|---------------------------------------|----------------------------------------------------------------------------------------------|---------------------|
| MoO <sub>3</sub> /Polypyrrole                                        | 129 F/g at 0.25 A/g                                                   | 1.0 M Na <sub>2</sub> SO <sub>4</sub> | 90% capacity retention after 2000 cycle at 0.67 A/g                                          | 12                  |
| RGO(MP)                                                              | 553 F/g at 1mV/s                                                      | 1.0 M H <sub>2</sub> SO <sub>4</sub>  | 86.6 % capacity retention after 200 cycle at 20 mV/s                                         | 13                  |
| MoO <sub>2</sub> /SWNT                                               | 597 F/g at 10 mV/s                                                    | 0.1 M Na <sub>2</sub> SO <sub>4</sub> | 97.5 % capacity retention after 600 cycle at 10 mV/s                                         | 14                  |
| α-MoO <sub>3</sub> nano belts                                        | 369 F/g at 0.1 A/g                                                    | 0.5 M LiSO <sub>4</sub>               | 95% capacity retention after 500 cycle at 0.25 A/g                                           | 15                  |
| α-MoO <sub>3</sub><br>a. Microsphere<br>b. Micro belt<br>c. Nano rod | a. 134.9 F/g<br>b. 91.8 F/g<br>c. 191.2 F/g<br>at 5 mVS <sup>-1</sup> | 0.1 M Na <sub>2</sub> SO <sub>4</sub> | Over all 70% capacity retention for all sample after 1000 cycle at 1A/g                      | 16                  |
| <b>C@MoO<sub>2</sub> yolk shell</b>                                  | <b>188 C/g (423 F/g) at 0.5 A/g</b>                                   | <b>3M KOH</b>                         | <b>77% of the initial specific capacity retention after 5000 cycles at 5 Ag<sup>-1</sup></b> | <b>Present work</b> |

## Reference:

1. V. Kumar and P. S. Lee, *J. Phys. Chem. C*, 2015, **119**, 9041–9049.
2. D. Hanlon, C. Backes, T. M. Higgins, M. Hughes, A. O'Neill, P. King, N. M. Evoy, G. S. Duesberg, B. M. Sanchez, H. Pettersson, V. Nicolosi, and J. N. Coleman, *Chem. Mater.*, 2014, **26**, 1751–1763.
3. V. Kumar, X. Wang and P. S. Lee, *Nanoscale*, 2015, **7**, 11777–11786.
4. X. Xiao, C.(John) Zhang, S. Lin , L. Huang , Z. Hua, Y. Cheng , T. Li , W. Qiao , D. Long , Y. Huang , L. Mai , Y. Gogotsi , J. Zhou. *Energy Storage Materials*, 2015, **1**, 1–8.
5. J. Li and X. Liu., *CrystEngComm*, 2014, **16**, 184–190.
6. J. Zhou, J. u. Song, H. Li, X. Feng, Z. Huang, S. Chen, Y. Ma, L. Wanga and X. Yanb, *New J. Chem.*, 2015, **39**, 8780-8786.
7. L. S. Aravindaa, U. Bhatb, B. R. Bhat, *Electrochimica Acta.*, 2013, **112**, 663– 669.
8. L.S. Aravinda , K.K. Nagaraja , K. Udaya Bhat , B. R. Bhat, *Journal of Electroanalytical Chemistry*, 2013, **699**,28–32.
9. H. Ji , X. Liu , Z. Liu , B. Yan , L. Chen , Y. Xie , C. Liu , W. Hou , and G.Yang, *Adv. Funct. Mate.*, 2015, **25**, 1886–1894.

10. M. Sarfraz, M. F. A. Aboud, I. Shakir, *Journal of Alloys and Compounds*, 10.1016/j.jallcom.2015.07.274
11. W. Tang, L. Liu, S. Tian, L. Li, Y. Yue, Y. Wu and K. Zhu., *Chem. Commun.*, 2011, **47**, 10058–10060.
12. X. Zhang, X. Zeng, M. Yang, and Y. Qi, *ACS Appl. Mater. Interfaces*, 2014, **6**, 1125–1130.
13. X. Xia, Q. Hao, W. Lei, W. Wang, H. Wang and X. Wang, *J. Mater. Chem.*, 2012, **22**, 8314–8320.
14. F. Gao, L. Zhang, S. Huang, *Materials Letters*, 2010, **64**, 537–540.
15. J. Jiang, J. Liu, S. Peng, D. Qian, D. Luo, Q. Wang, Z. Tian and Y. Liu, *J. Mater. Chem. A*, 2013, **1**, 2588–2594.
16. Z. Cui, W. Yuan and C. M. Li, *J. Mater. Chem. A*, 2013, **1**, 12926–12931.
